# Supplementary material for: A Retrospective Analysis of Nonocclusive Mesenteric Ischemia in Medical and Surgical ICU Patients: Clinical Data on Demography, Clinical Signs, and Survival
Source: PubMed Central journal article supplement — J Intensive Care Med. 2019 Mar 25;35(11):1162–72. doi: 10.1177/0885066619837911 (PMC7536530; doi:10.1177/0885066619837911), 2019-03-25
Supplement: Supplemental_material.pdf [file Supplemental_material.pdf]

## Supplemental Material

**Suppl. FIGURE 1 – Flow chart of study participants.** Flow chart demonstrates inclusion of patients into the retrospective analysis.

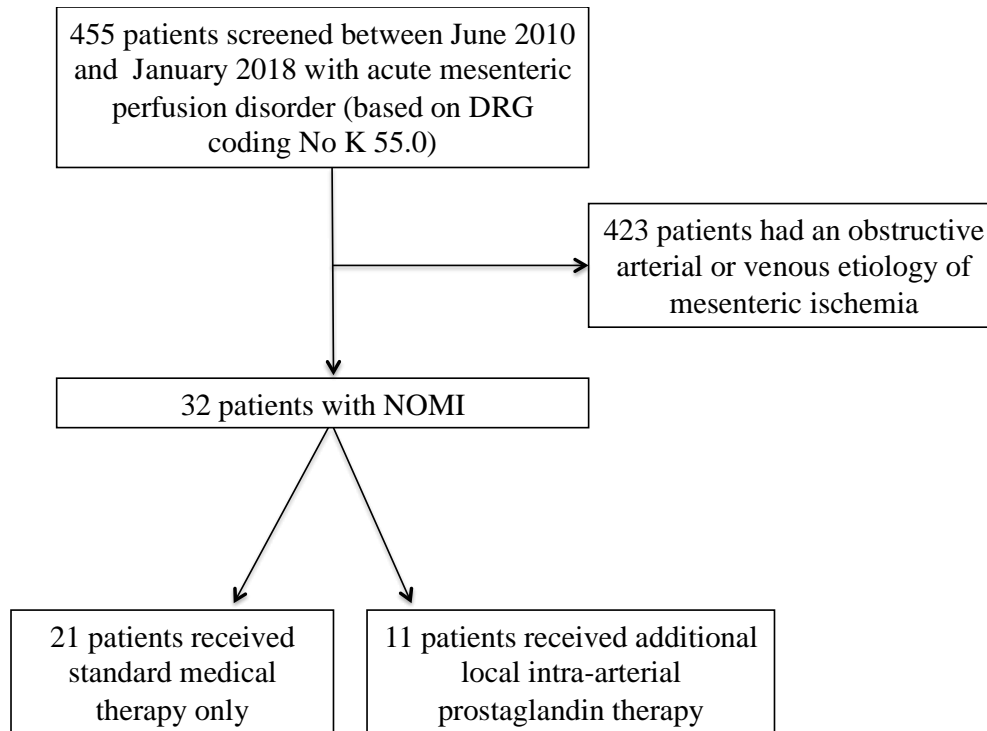

**Suppl. FIGURE 2 – Organ failure and multiple organ failure at various time points in relation to NOMI diagnosis.** Box and whisker blots showing the SOFA Score 24hrs before (-24), at the time (0) and 24hrs after diagnosis of NOMI (+24 hrs) (A). SOFA score significantly increased in the 24hrs before diagnosis of NOMI ( $p < 0.0001$ ). The fraction of higher grade multi-organ failure progressively developed in the further course (B)

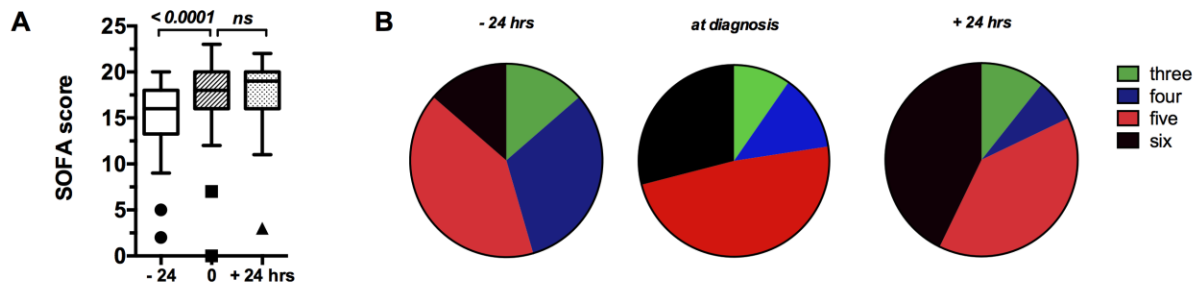

**Suppl. TABLE 1 – CT-A characteristics of patients at diagnosis.** Displayed are diverse imaging characteristics that support a diagnosis of NOMI in a patient with clinical suspicion of NOMI. Values are displayed as numbers (percentage) or means  $\pm$  standard deviation.

**Suppl. Table 1:** CT-A characteristics of patients at diagnosis (n=30)

|                                                                                                                            | <b>Category</b>                                     | <b>no (%) / Mean <math>\pm</math> SD</b> |
|----------------------------------------------------------------------------------------------------------------------------|-----------------------------------------------------|------------------------------------------|
| <b>Semiquantitative mesenteric vessel width</b><br>(1=barely definable-, 2=narrow-, 3=regular-, 4=dilated vessel diameter) | mesenteric arterial                                 |                                          |
|                                                                                                                            | 1                                                   | 9 (30)                                   |
|                                                                                                                            | 2                                                   | 21 (70)                                  |
|                                                                                                                            | 3                                                   | 0 (0)                                    |
|                                                                                                                            | 4                                                   | 0 (0)                                    |
|                                                                                                                            | mesenteric venous                                   |                                          |
|                                                                                                                            | 1                                                   | 7 (23.3)                                 |
|                                                                                                                            | 2                                                   | 19 (63.3)                                |
| <b>Semiquantitative mesenteric vessel contrast</b><br>(1=strongly-, 2=moderately-, 3=barely visible contrast)              | mesenteric arterial                                 |                                          |
|                                                                                                                            | 1                                                   | 17 (56.6)                                |
|                                                                                                                            | 2                                                   | 11 (36.7)                                |
|                                                                                                                            | 3                                                   | 2 (6.7)                                  |
|                                                                                                                            | mesenteric venous                                   |                                          |
|                                                                                                                            | 1                                                   | 15 (50)                                  |
| <b>Quantitative mesenteric vessel diameter (mm)</b>                                                                        | proximal SMA (1cm distal of origin)                 | 5.5 $\pm$ 1.5                            |
|                                                                                                                            | middle SMA (after origin of first segmental branch) | 4.2 $\pm$ 1                              |
|                                                                                                                            | distal SMA (proximal ileocolic area)                | 1.9 $\pm$ 0.6                            |
|                                                                                                                            | SMV (1cm proximal to the portal vein)               | 9.7 $\pm$ 2.6                            |
| <b>Secondary signs</b>                                                                                                     | Pneumatosis intestinalis                            | 4 (13.3)                                 |
|                                                                                                                            | Portal venous gas                                   | 3 (10)                                   |
|                                                                                                                            | Bowel wall edema                                    | 26 (86.7)                                |
|                                                                                                                            | Bowel wall thickening                               | 18 (60)                                  |
|                                                                                                                            | Bowel wall hypoenhancement                          | 25 (83.3)                                |
|                                                                                                                            | Bowel loop distention                               | 12 (40)                                  |
|                                                                                                                            | Mesenteric edema                                    | 25 (83.3)                                |
| <b>Additional vessel sclerosis SMA</b>                                                                                     |                                                     | 3 (10)                                   |

**Suppl. TABLE 2 – Angiography characteristics of patients before and after initial prostaglandin bolus.** Displayed are diverse imaging characteristics on initial angiography and following the first bolus infusion of 20ug of alprostadil. Values are displayed as numbers (percentage).

**Suppl. Table 2:** Angiography characteristics of patients before and after initial prostaglandin bolus (n=9)

|                                                    | <u>before</u> prostaglandin bolus |          | <u>after</u> prostaglandin bolus |          |
|----------------------------------------------------|-----------------------------------|----------|----------------------------------|----------|
|                                                    | Category                          | no (%)   | Category                         | no (%)   |
| <i>Mesenteric vessel morphology (0-4)</i>          | 0                                 | 0 (0)    | 0                                | 3 (33.3) |
|                                                    | 1                                 | 1 (11.1) | 1                                | 6 (66.7) |
|                                                    | 2                                 | 7 (77.8) | 2                                | 0 (0)    |
|                                                    | 3                                 | 1 (11.1) | 3                                | 0 (0)    |
|                                                    | 4                                 | 0 (0)    | 4                                | 0 (0)    |
| <i>Contrast medium reflux into the aorta (0-2)</i> | 0                                 | 6 (66.7) | 0                                | 9 (100)  |
|                                                    | 1                                 | 3 (33.3) | 1                                | 0 (0)    |
|                                                    | 2                                 | 0 (0)    | 2                                | 0 (0)    |

***Mesenteric vessel morphology:***

- 0 SMA trunk, branches and mesenteric arcades normal
- 1 SMA trunk normal, several SMA branches and/or mesenteric arcades slightly constricted  
SMA trunk slightly constricted, normal SMA branches and mesenteric arcades  
SMA trunk, several SMA branches and/or mesenteric arcades slightly constricted
- 2 SMA trunk partly, multiple SMA branches and/or mesenteric arcades constricted
- 3 SMA trunk normal, multiple SMA branches and/or mesenteric arcades completely constricted and partly not visible

***Contrast medium reflux into the aorta:***

- 0 No contrast medium reflux into the aorta
- 1 Some contrast medium reflux into the aorta
- 2 Severe contrast medium reflux with complete aortogram

**ABBREVIATIONS for Supplemental Material:**

DRG – Diagnosis related groups, NOMI – non-occlusive mesenteric ischemia, SOFA - Sequential Organ Failure Assessment, NE dose – norepinephrine dose, CK – creatine kinase, LDH – Lactate dehydrogenase, AST – Aspartate aminotransferase, ALT – Alanine

aminotransferase, INR – international normalized ratio, CT-A – Computed tomography angiography, SD – standard deviation
